# Supplementary material for: Multispectral optoacoustic tomography of peripheral arterial disease based on muscle hemoglobin gradients—a pilot clinical study
Source: PubMed Central journal article supplement — Ann Transl Med. 2021 Jan;9(1):36. doi: 10.21037/atm-20-3321 (PMC7859778; doi:10.21037/atm-20-3321), 2021-01
Supplement: atm-09-01-36-dss.pdf [file atm-09-01-36-dss.pdf]

## Data Sharing Statement

|                     |                                                                                                                                                    |                                                                                                                               |
|---------------------|----------------------------------------------------------------------------------------------------------------------------------------------------|-------------------------------------------------------------------------------------------------------------------------------|
| <b>Article Info</b> | http://dx.doi.org/10.21037/atm-20-3321                                                                                                             |                                                                                                                               |
| <b>Item</b>         | <b>Question</b>                                                                                                                                    | <b>Authors' Response<br/>(place "-" if not applicable)</b>                                                                    |
| 1                   | Would you like to share data collected for your study to others?                                                                                   | Data may be shared by the authors upon reasonable request.                                                                    |
| 2                   | If not, would you like to share the reason for your decision?                                                                                      | -                                                                                                                             |
| 3                   | What data in particular will be shared?                                                                                                            | Raw MSOT/US data.                                                                                                             |
| 4                   | Any other documents will be share? Such as study protocol, statistical analysis plan, informed consent form, clinical study report, analytic code. | - (there are no other documents to be shared)                                                                                 |
| 5                   | When will data availability begin?                                                                                                                 | From the publication date.                                                                                                    |
| 6                   | When will data availability end?                                                                                                                   | One year after the publication date.                                                                                          |
| 7                   | To whom will you share the data?                                                                                                                   | Researchers who are interested in clinical MSOT studies.                                                                      |
| 8                   | For what type of analysis or purpose?                                                                                                              | For investigating the potential of MSOT/US for diagnosis and therapy monitoring in patients with peripheral arterial disease. |
| 9                   | How or where can the data/documents be obtained?                                                                                                   | Emails could be sent to the address below to obtain the shared data:<br>moritz.wildgruber@med.uni-muenchen.de                 |
| 10                  | Any other restrictions?                                                                                                                            | We may balance the potential benefits and risks for each request and then provide the required data.                          |
